Original Article

# Impact of p16 expression in oropharyngeal cancer in the postoperative setting: the necessity of re-evaluating traditional risk stratification

Jeongshim Lee<sup>1</sup>, Jee Suk Chang<sup>1</sup>, Hyung Joo Kwon<sup>2</sup>, Se-Heon Kim<sup>3</sup>, Sang Joon Shin<sup>4</sup>, and Ki Chang Keum<sup>1,\*</sup>

<sup>1</sup>Department of Radiation Oncology, Yonsei University College of Medicine, Seoul, <sup>2</sup>Department of Pathology, Yonsei University College of Medicine, Seoul, <sup>3</sup>Department of Otorhinolaryngology, Yonsei University College of Medicine, Seoul, and <sup>4</sup>Department of Medical Oncology, Yonsei University College of Medicine, Seoul, Korea

\*For reprints and all correspondence: Ki Chang Keum, Department of Radiation Oncology, Yonsei University College of Medicine, 50 Yonsei-ro, Seodaemun-gu, Seoul 03722, Korea. E-mail: KCKEUM@yuhs.ac

Received 26 December 2015; Accepted 25 June 2016

## Abstract

**Objective:** To evaluate the impact of p16 expression as a surrogate marker of human papilloma-virus status in oropharyngeal squamous cell carcinoma patients underwent surgery followed by postoperative radiotherapy.

**Methods:** We identified 126 consecutive patients with histologically confirmed, newly diagnosed oropharyngeal squamous cell carcinoma who received surgery followed by radiotherapy and had p16 expression data available. All patients were treated between 2001 and 2011. Patients with high-risk factors (positive surgical margin and/or extracapsular extension) or other risk factors (multiple positive lymph nodes, perineural/lymphovascular invasion) were offered postoperative radiotherapy with or without concurrent chemotherapy.

**Results:** One hundred and four (82.5%) patients were p16-positive (p16 (+)) and 22 (17.5%) were p16-negative (p16 (–)). With a median follow-up of 56 months, patients with p16 (+) oropharyngeal squamous cell carcinoma exhibited a significantly better 5-year disease-free survival (80.7% vs. 57.6%,  $P < 0.001$ ) and overall survival (84.9% vs. 59.1%,  $P < 0.001$ ) than those with p16 (–) tumors. The p16 (+) oropharyngeal squamous cell carcinoma with high-risk factors ( $n = 64$ ) showed no difference in disease-free survival (79.7% vs. 68.3%;  $P = 0.531$ ) and overall survival (82.1% vs. 76.2%;  $P = 0.964$ ) between postoperative radiotherapy and postoperative radiotherapy with concurrent chemotherapy.

**Conclusions:** Expression of p16 is a strong independent prognostic factor of survival in the post-operative setting of oropharyngeal squamous cell carcinoma. The favorable prognosis of p16 (+) oropharyngeal squamous cell carcinoma suggests a need to re-examine traditional risk stratification for determining optimal adjuvant treatment.

**Key words:** oropharyngeal squamous cell carcinoma, HPV, p16, postoperative setting, risk stratification

## Introduction

Over several decades, there has been a change in the etiology of oropharyngeal squamous cell carcinoma (OPSCC). Overall, this change may be attributed to decreased smoking and alcohol consumption and increased infection of human papillomavirus (HPV) (1–3). An estimated 70% of all OPSCCs are due to HPV. In particular, cancers of the palatine tonsils and the base of tongue may be up to 90% HPV-positive (2,4).

The presence of HPV infection in OPSCC is a major determinant in prognosis. Generally, patients with HPV-positive OPSCC have a superior outcome compared with patients with HPV-negative disease (3,5–7). However, this favorable prognosis of OPSCC patients with HPV-positive have been demonstrated in clinical studies that were focused on patients treated by primary radiotherapy (RT) or chemoradiotherapy (CRT). Therefore, the report of patients with HPV-associated OPSCC treated with surgical resection followed by postoperative RT (PORT) is relatively decimal.

In our institution, the application of surgery followed by PORT for OPSCC is the preferred course of treatment. It has been used increasingly under the influence of recent advances in robotic and transoral laser microsurgery. We evaluated the clinical outcome of patients with HPV-associated OPSCC based on p16 expression as surrogate marker of HPV status in the oropharynx who underwent surgical resection followed by PORT.

## Methods

### Study population

We identified 150 consecutive patients with histologically confirmed, newly diagnosed, and previously untreated OPSCC who received surgery followed by PORT with curative intent at our institution between January 2001 and December 2011. All clinical and pathological data regarding disease and treatment characteristics were reviewed. This retrospective review was approved by the Institutional Review Board. Five patients who received induction chemotherapy before surgical resection were excluded. And we excluded 19 patients with unavailable HPV tumor status via p16 immunohistochemical analysis. The 126 remaining patients were included for analysis.

All 126 patients underwent surgical resection for OPSCC. In our institution, transoral robotic surgery (TORS) has not been used commonly until 2011, although TORS was first applied in 2008. Based on final pathologic reports after surgery, patients with risk factors such as incomplete resection, extracapsular extension (ECE), close/positive surgical margin, multiple positive lymph node, perineural invasion (PNI) and lymphovascular invasion (LVI) were offered PORT. Since 2007, concurrent chemotherapy has been generally administered to patients with high-risk factors (positive surgical margin and/or ECE) and other combined risk factors, according to the clinical discretion of physician. RT doses for high-risk areas (residual tumor, positive surgical margin area, positive lymph node bed, especially with ECE and unresectable positive retropharyngeal lymph node) were 60–70 Gray (Gy). The doses for intermediate risk areas (positive tumor bed area, positive lymph node area and minimum of first nodal echelons beyond positive lymph node area) were 54–60 Gy. The doses for low-risk areas (contralateral neck node, lower neck) were 50–54 Gy.

### Immunohistochemistry for p16

Pathological review was carried out by two pathologists who specialize in head and neck cancer. Eligible samples included

histopathologically confirmed invasive OPSCC, and 126 tumor tissues could be retrieved from the pathology archives. To assess HPV status of each tumor, we examined p16 expression, which is recognized as a surrogate marker for HPV in the oropharynx, using formalin-fixed, paraffin-embedded (FFPE) surgical tissue. The p16-immunostaining was carried out with a CINtec TM Histology Kit (Roche MTM laboratories AG, Heidelberg, Germany), which contains the mouse monoclonal antibody INK4A that recognizes p16. Representative 4- $\mu$ m tumor sections cut from FFPE tissue blocks were de-paraffinized. After heat-induced epitope retrieval, immunohistochemistry for p16<sup>INK4a</sup> was performed with a primary antibody dilution of 1:7 per manufacturer's protocol. Samples were considered p16-positive (p16 (+)) if strong and diffuse nuclear and cytoplasmic immunostaining was observed in at least 70% of the carcinoma tissue (8,9). Tissues with only faintly diffuse or no reactivity were considered to be p16-negative (p16 (–)).

### Statistical analysis

Disease-free survival (DFS) was defined as the amount of time from the start of treatment to the date of any disease recurrence or death from any cause. Overall survival (OS) was calculated as the amount of time from the start of treatment to the date of death from any cause or last day when the patient was known to be alive. OS and DFS were estimated using the Kaplan–Meier method, and survival curves were compared using the log-rank test. To determine the effects of distinct prognostic factors on survival, multivariate analysis was performed according to the Cox's regression model in a stepwise backward elimination method. Differences in patient characteristics between p16 (+) and p16 (–) tumors were assessed using the Pearson  $\chi^2$ -test. In all statistical analyses,  $P < 0.05$  was considered to be significant. Statistical analysis was carried out using IBM SPSS Statistics version 20 (SPSS Inc., Chicago, IL, USA).

## Results

### Patient, tumor and treatment characteristics

Of the 126 patients with established p16 status, 104 (82.5%) were p16 (+) and 22 (17.5%) were p16 (–). Patients who were p16 (+) more commonly complained of a neck mass as initial symptom, whereas those who were p16 (–) had symptoms related to the primary tumor site ( $P = 0.017$ ). Patients who were p16 (+) had tumors confined to the tonsil or base of tongue, while p16 (–) patients had tumors in all oropharyngeal sites ( $P < 0.001$ ). The distribution of age at diagnosis ( $P = 0.621$ ) and smoking history ( $P = 0.536$ ) were not significantly different between the two cohorts. With respect to tumor characteristics, there were no significant differences in the distribution of risk factors between both groups. The patient and tumor characteristics were summarized in Table 1.

An open surgical approach was undertaken in 85.7%, whereas 14.3% underwent transoral robotic surgery. All patients, except for one, underwent neck dissection. PORT after surgical approach was offered to 116 patients with risk features of a close/positive margin, ECE, PNI, LVI and multiple positive lymph nodes, while the remaining 10 patients received PORT at the discretion of the physician. Of these 10 patients, 9 had a primary tumor larger than 3 cm and 1 had a pathological T4a tumor. Among all patients, 89 patients (70.6%) received PORT alone and 37 patients (29.4%) received PORT with concurrent chemotherapy or targeted agent. PORT was delivered by 3-dimensional conformal RT in 27 patients (21.4 %) and by intensity-modulated RT in 99 patients (78.6%). Of the

**Table 1.** Patient and tumor characteristics

| Variables                         |                       | All, N = 126 | p16 expression   |                 | P      |
|-----------------------------------|-----------------------|--------------|------------------|-----------------|--------|
|                                   |                       |              | p16 (+), N = 104 | p16 (-), N = 22 |        |
| Age, years                        | Median (range)        | 58 (32–78)   | 58 (32–78)       | 62 (41–74)      |        |
| Age group, n (%)                  | <60 years             | 69 (54.8)    | 58 (55.8)        | 11 (50.0)       | 0.621  |
|                                   | ≥60 years             | 57 (45.2)    | 46 (44.2)        | 11 (50.0)       |        |
| Sex, n (%)                        | Male                  | 110 (87.3)   | 89 (85.6)        | 21 (95.5)       | 0.206  |
|                                   | Female                | 16 (12.7)    | 15 (14.4)        | 1 (4.5)         |        |
| Subsite, n (%)                    | Tonsil                | 10 (80.2)    | 89 (85.6)        | 12 (54.5)       | <0.001 |
|                                   | Base of tongue        | 19 (15.1)    | 15 (14.4)        | 4 (18.2)        |        |
|                                   | Soft palate           | 4 (3.2)      |                  | 4 (18.2)        |        |
|                                   | Posterior wall        | 2 (1.6)      |                  | 2 (9.1)         |        |
| Initial symptoms, n (%)           | Neck mass             | 63 (50.0)    | 57 (54.8)        | 6 (27.3)        | 0.017  |
|                                   | Sore throat/dysphagia | 42 (33.3)    | 29 (27.9)        | 13 (59.1)       |        |
|                                   | Tonsil lesion         | 21 (16.7)    | 18 (17.3)        | 3 (13.6)        |        |
|                                   |                       |              |                  |                 |        |
| Smoking group, n (%)              | Never                 | 75 (59.5)    | 60 (57.7)        | 15 (68.2)       | 0.536  |
|                                   | <10 PY                | 3 (2.4)      | 3 (2.9)          |                 |        |
|                                   | ≥10 PY                | 48 (38.1)    | 41 (39.4)        | 7 (31.8)        |        |
| ECOG, n (%)                       | 0–1                   | 122 (96.8)   | 100 (96.2)       | 22 (100)        | 0.350  |
|                                   | 2–4                   | 4 (3.2)      | 4 (3.8)          |                 |        |
|                                   |                       |              |                  |                 |        |
| Histologic differentiation, n (%) | WD                    | 16 (12.7)    | 10 (9.6)         | 6 (27.3)        | 0.059  |
|                                   | MD                    | 75 (59.5)    | 65 (62.5)        | 10 (45.5)       |        |
|                                   | PD                    | 30 (23.8)    | 26 (25.0)        | 4 (18.2)        |        |
|                                   | UE                    | 5 (4.0)      | 3 (2.9)          | 2 (9.1)         |        |
| Tumor size, cm                    | Mean (±SD)            | 3.0 (±1.1)   | 3.0 (±1.0)       | 3.4 (±1.7)      | 0.076  |
| Metastatic LN size, cm            | Mean (±SD)            | 2.2 (±1.3)   | 2.3 (±1.3)       | 1.8 (±1.3)      | 0.440  |
| cT stage, n (%)                   | II/III                | 115 (91.2)   | 95 (91.3)        | 20 (91.0)       | 0.947  |
|                                   | IV                    | 11 (8.8)     | 9 (8.7)          | 2 (9.0)         |        |
| cStage, n (%)                     | II/III                | 33 (26.2)    | 26 (25.0)        | 7 (31.8)        | 0.509  |
|                                   | IV                    | 93 (73.8)    | 78 (75.0)        | 15 (68.2)       |        |
| pT stage, n (%)                   | II/III                | 110 (87.3)   | 90 (86.5)        | 20 (91.0)       | 0.576  |
|                                   | IV                    | 16 (12.7)    | 14 (13.5)        | 2 (9.0)         |        |
| pStage, n (%)                     | II/III                | 31 (24.6)    | 25 (24.0)        | 6 (27.3)        | 0.749  |
|                                   | IV                    | 95 (75.4)    | 79 (76.0)        | 16 (72.7)       |        |
| Surgical margin, n (%)            | Negative              | 78 (61.9)    | 62 (59.6)        | 16 (72.7)       | 0.250  |
|                                   | Positive              | 48 (38.1)    | 42 (40.4)        | 6 (27.3)        |        |
| ECE, n (%)                        | Absent                | 77 (61.6)    | 64 (61.5)        | 14 (63.6)       | 0.854  |
|                                   | Present               | 48 (38.4)    | 40 (38.5)        | 8 (36.4)        |        |
| PNI, n (%)                        | Absent                | 112 (88.9)   | 93 (89.4)        | 19 (86.4)       | 0.678  |
|                                   | Present               | 14 (11.1)    | 11 (10.6)        | 3 (13.6)        |        |
| LVI, n (%)                        | Absent                | 93 (73.8)    | 74 (71.2)        | 19 (86.4)       | 0.140  |
|                                   | Present               | 33 (26.2)    | 30 (28.8)        | 3 (13.6)        |        |

PY, pack-years; ECOG, Eastern Cooperative Oncology Group; WD, well differentiated; MD, moderately differentiated; PD, poorly differentiated; UE, unevaluable; LN, lymph node; cT stage, clinical tumor stage; cStage, clinical stage; pT stage, pathological tumor stage; pStage, pathological stage; ECE, extracapsular extension; PNI, perineural invasion; LVI, lymphovascular invasion.

37 patients (40%) with PORT and concurrent chemotherapy, 34 received cisplatin-based chemotherapy, whereas 2 received cetuximab and 1 received TS-1. The detailed treatment characteristics are shown in Table 2. In addition, we summarized the characteristics of the patients according to adjuvant therapy (PORT vs. PORT with chemotherapy) in Table 3. Distributions for each risk factor and combined risk factors were significantly different between patient groups receiving both adjuvant treatments

### Outcomes and prognostic factors in entire patients

With a median follow-up of 56 months (range, 4–157 months), 20 patients (15.9%) developed recurrences, including 9 loco-regional recurrences, 9 distant metastases and 2 both loco-regional and distant metastases. We identified 13 recurrences (12.5%; 5 loco-regional, 6 distant metastases, and 2 both loco-regional and distant metastases) in the p16 (+) patients and 7 recurrences (31.8%; 4

loco-regional and 3 distant metastases) in the p16 (–) patients. By analyzing these recurrences, we found significantly fewer recurrences in p16 (+) patients than in p16 (–) patients (12.5% vs. 31.8%,  $P = 0.024$ ). However, there was no significant difference in patterns of failure ( $P = 0.062$ ) between the two groups. Furthermore, we observed that both loco-regional recurrence rate (6.7% vs. 18.2%,  $P = 0.084$ ) and distant metastasis rate (7.7% vs. 13.6%,  $P = 0.370$ ) between both groups were comparable. The 5-year DFS was 76.7% for the entire patient cohort. Patients with p16 (+) OPSCC exhibited a significantly better 5-year DFS than those with p16 (–) OPSCC (80.7% vs. 57.6%,  $P < 0.005$ , Fig. 1A). Univariate analysis revealed other independent predictors of DFS, including pathologic T stage ( $P = 0.024$ ), PNI ( $P = 0.007$ ) and LVI ( $P = 0.028$ ). On multivariate Cox regression model in a stepwise method, p16 (+) status (hazard ratio [HR], 0.19; 95% confidence interval [CI], 0.08–0.44,  $P < 0.001$ ), pathologic T4 stage (HR, 2.67; 95% CI, 1.09–7.34,

**Table 2.** Treatment characteristics

| Variables                                               |                           | All, N = 126   | p16 expression   |                 | P     |
|---------------------------------------------------------|---------------------------|----------------|------------------|-----------------|-------|
|                                                         |                           |                | p16 (+), N = 104 | p16 (–), N = 22 |       |
| Surgical approach, n (%)                                | Open procedure            | 108 (85.7)     | 87 (83.7)        | 21 (95.5)       | 0.151 |
|                                                         | Transoral robotic surgery | 18 (14.3)      | 17 (16.3)        | 1 (4.5)         |       |
| Type of neck dissection, n (%)                          | Selective neck dissection | 19 (15.1)      | 15 (14.4)        | 4 (18.2)        | 0.827 |
|                                                         | Modified neck dissection  | 61 (48.4)      | 52 (50.0)        | 9 (40.9)        |       |
|                                                         | Radical neck dissection   | 45 (35.7)      | 36 (34.6)        | 9 (40.9)        |       |
|                                                         | NA <sup>a</sup>           | 1 (0.8)        | 1 (1.0)          |                 |       |
| Extent of neck dissection, n (%)                        | Unilateral                | 74 (58.7)      | 64 (61.5)        | 10 (45.5)       | 0.314 |
|                                                         | Bilateral                 | 51 (40.5)      | 39 (37.5)        | 12 (54.5)       |       |
|                                                         | NA <sup>a</sup>           | 1 (0.8)        | 1 (1.0)          |                 |       |
| Number of dissected neck node <sup>b</sup>              | Median (range)            | 52 (10–149)    | 51 (12–118)      | 59 (10–149)     | 0.447 |
| Number of metastatic neck node <sup>b</sup>             | Median (range)            | 2 (0–20)       | 2 (0–20)         | 3 (0–7)         | 0.836 |
| Modality of RT, n (%)                                   | Conventional              | 27 (21.4)      | 19 (18.3)        | 8 (36.4)        | 0.060 |
|                                                         | IMRT                      | 99 (78.6)      | 85 (81.7)        | 14 (63.6)       |       |
| Total dose of RT, Gy                                    | Median (range)            | 63 (75.9–50.4) | 63 (75.9–50.4)   | 63 (68.4–54.0)  | 0.852 |
| Fractionated dose of RT, Gy                             | Median (range)            | 1.8 (1.5–2.3)  | 1.8 (1.5–2.2)    | 1.9 (1.5–2.3)   | 0.120 |
| Adjuvant therapy, n (%)                                 | RT alone                  | 89 (70.6)      | 71 (68.3)        | 18 (81.8)       | 0.205 |
|                                                         | CRT                       | 37 (29.4)      | 33 (31.7)        | 4 (18.2)        |       |
| Regimen of concurrent chemotherapy <sup>c</sup> , n (%) | Cisplatin                 | 34 (91.9)      | 31 (93.9)        | 3 (75.0)        | 0.179 |
|                                                         | Cetuximab                 | 2 (5.4)        | 1 (3.0)          | 1 (25.0)        |       |
|                                                         | TS-1                      | 1 (2.7)        | 1 (3.0)          |                 |       |

NA, not applicable; RT, radiotherapy; IMRT, intensity-modulated radiotherapy; Gy, Gray; CRT, chemoradiotherapy; TS-1, oral fluoropyrimidine anticancer drug.

<sup>a</sup>One patient refused the neck node dissection.

<sup>b</sup>Calculation only includes patients underwent neck dissection ( $n = 125$ ).

<sup>c</sup>Calculation only includes patients treated with postoperative CRT ( $n = 40$ ).

$P = 0.033$ ) and positive LVI (HR, 2.74; 95% CI, 1.25–6.00,  $P = 0.01$ ) were significant prognosticators for DFS (Table 4).

Twenty-five patients died of the disease during the follow-up period. The 5-year OS in all patients was 80.4%. Patients with p16 (+) OPSCC had a significantly better 5-year OS than patients with p16 (–) OPSCC (84.9% vs. 59.1%,  $P < 0.001$ , Fig. 1B). In addition, univariate analysis demonstrated that both p16 expression status ( $P < 0.001$ ) and PNI ( $P = 0.048$ ) correlated significantly with OS rates, while surgical margin ( $P = 0.053$ ) exhibited a correlative trend with OS. The stepwise multivariate analysis identified both p16 (+) expression (HR, 0.09; 95% CI, 0.03–0.23,  $P < 0.001$ ) and positive surgical margin (HR, 2.50; 95% CI, 1.03–6.07,  $P = 0.043$ ) as independent prognostic factors of OS (Table 4).

### Outcomes in p16 (+) OPSCC patients with high-risk factors

To gain insights into optimized adjuvant therapy, we analyzed 64 patients with p16 (+) OPSCC with high-risk factors. The 5-year DFS and OS were 75.1% and 80.7%, respectively. In terms of adjuvant therapy (PORT alone vs. PORT with adjuvant chemotherapy), the full details of patients and their tumor characteristics treated with both treatments are listed in the Supplementary Table 1. The 5-year DFS did not differ significantly for patients who received PORT alone ( $n = 35$ ) compared with those who received PORT with adjuvant chemotherapy ( $n = 29$ ) (79.7% vs. 68.3%;  $P = 0.531$ ) (Fig. 2A). Similarly, there were no significant differences in 5-year OS for patients who received PORT alone versus PORT with adjuvant chemotherapy (82.1% vs. 76.2%;  $P = 0.964$ ) (Fig. 2B). The modality of adjuvant treatment (PORT vs. PORT with chemotherapy) did not significantly affect either DFS or OS in a multivariate Cox regression model in a stepwise method. Only LVI was identified as an

independent risk factor for DFS (HR, 6.41; 95% CI, 1.27–32.41,  $P = 0.025$ ) and OS (HR, 3.26; 95% CI, 1.14–9.30,  $P = 0.027$ ). Data on multivariate analyses to assess potential prognostic factors for survival in p16 (+) OPSCC patients with high-risk factors are shown in Supplementary Table 2.

### Discussion

This study showed the clinical significance of p16 expression in a retrospective, unselected cohort of 126 patients with OPSCC. In the period 2000–11, p16 positivity in our cohorts was 82.5%. This prevalence rate is comparable with that in the USA and Europe (1,2,10). Additionally, a meta-analysis suggests that the proportion of OPSCC associated with HPV has increased from 40.5% before the year 2000 to 72.2% after 2005 (2). We reported that patients with p16 (+) OPSCC, managed with surgery followed by PORT with or without chemotherapy, showed significantly better 5-year DFS (80.7% vs. 57.6%,  $P < 0.001$ ) and OS survival (84.9% vs. 59.1%,  $P < 0.001$ ) than those with p16 (–) tumors. This could be understood in the same context that, in the literature, HPV infection and/or p16 positivity are associated with improved survival in OPSCC patients treated with primary RT and CRT (5,6,11). Indeed, p16 (+) OPSCC are a distinct type of cancer with a generally better outcome than p16 (–) disease, which may be independent of the treatment modality chosen.

The standard of care of OPSCC is multimodality therapy based on several factors, including clinical stage, individual patient factors such as comorbidities and preferences, and particularly, the institutional preference based on clinical discretion of the physician. Recently data suggest that most institutions prefer primary RT/CRT to surgery followed by PORT, as the former helps to preserve the

**Table 3.** Comparison of characteristics according to adjuvant therapy (N = 126)

| Variables                              |                     | Adjuvant therapy    |                | P      |
|----------------------------------------|---------------------|---------------------|----------------|--------|
|                                        |                     | RT alone,<br>N = 89 | CRT,<br>N = 37 |        |
| Age, n (%)                             | <60 years           | 49 (55.1)           | 20 (54.1)      | 0.918  |
|                                        | ≥60 years           | 40 (44.9)           | 17 (45.9)      |        |
| Smoking, n (%)                         | <10 PY <sup>a</sup> | 59 (66.3)           | 19 (51.4)      | 0.116  |
|                                        | ≥10 PY              | 30 (33.7)           | 15 (48.6)      |        |
| Histologic differentiation, n (%)      | WD                  | 11 (12.4)           | 5 (13.5)       | 0.736  |
|                                        | MD                  | 55 (61.8)           | 20 (54.1)      |        |
|                                        | PD                  | 19 (21.3)           | 11 (29.7)      |        |
|                                        | UE                  | 4 (4.5)             | 1 (2.7)        |        |
| p16 expression                         | Negative            | 18 (20.2)           | 4 (10.8)       | 0.205  |
|                                        | Positive            | 71 (79.8)           | 33 (89.2)      |        |
| Tumor size, n (%) <sup>b</sup>         | < 3 cm              | 38 (42.7)           | 18 (48.6)      | 0.475  |
|                                        | ≥ 3 cm              | 48 (53.9)           | 19 (51.4)      |        |
| Metastatic LN size, n (%) <sup>b</sup> | < 2 cm              | 35 (42.7)           | 7 (20.0)       | 0.012  |
|                                        | ≥ 2 cm              | 47 (57.3)           | 28 (80.0)      |        |
| pT stage, n (%)                        | II/III              | 76 (85.4)           | 34 (91.9)      | 0.318  |
|                                        | IV                  | 13 (14.6)           | 3 (8.1)        |        |
| Surgical margin, n (%)                 | Negative            | 56 (62.9)           | 22 (59.5)      | 0.716  |
|                                        | Positive            | 33 (37.1)           | 15 (40.5)      |        |
| ECE, n (%)                             | Absent              | 67 (75.3)           | 11 (29.7)      | <0.001 |
|                                        | Present             | 22 (24.7)           | 26 (70.3)      |        |
| Multiple metastatic LN                 | Absent              | 33 (37.1)           | 3 (8.1)        | <0.001 |
|                                        | Present             | 56 (62.9)           | 34 (91.9)      |        |
| PNI, n (%)                             | Absent              | 86 (96.6)           | 26 (70.3)      | <0.001 |
|                                        | Present             | 3 (3.4)             | 11 (29.7)      |        |
| LVI, n (%)                             | Absent              | 77 (86.5)           | 16 (43.2)      | <0.001 |
|                                        | Present             | 12 (13.5)           | 21 (56.8)      |        |
| High-risk factors <sup>c</sup>         | Absent              | 45 (50.6)           | 5 (13.5)       | <0.001 |
|                                        | Present             | 44 (49.4)           | 32 (86.5)      |        |
| Risk factors <sup>d</sup>              | Absent              | 34 (38.2)           | 5 (13.5)       | 0.006  |
|                                        | Present             | 55 (61.8)           | 32 (86.5)      |        |

<sup>a</sup>Calculation includes patients had smoking history that both non-smoker and below 10 PY.

<sup>b</sup>Calculation includes only patients had pathological report.

<sup>c</sup>Includes features such as positive surgical margin and ECE.

<sup>d</sup>Includes features such as positive surgical margin, ECE, multiple metastatic LN, PNI and LVI.

organ in advanced OPSCC patients. Consequently, the majority of publications have focused on patients with OPSCC who received definitive RT. Generally, these conclusions regarding prognosis in HPV-positive OPSCC were based on results from tumors treated with definitive CRT (5–7,11). The prognosis of HPV-positive OPSCC after surgical resection and adjuvant PORT is relatively unclear because of a small number of clinical studies although this might be presumed good prognosis. Previous literature implied that HPV positivity is a predictor of prognosis for OPSCC in the postoperative setting. Haughey et al. reported that 171 p16 (+) OPSCC patients treated with transoral laser microsurgery had excellent survival outcomes including 5-year OS, disease-specific survival (DSS) and DFS of 91%, 94%, 88%, respectively (12). Rahmati et al. reported that patients who were p16 (+) had superior OS and DSS compared with patients who were p16 (–) (5-year OS, 74% vs. 47%;  $P = 0.04$  and 5-year DSS, 89% vs. 66%;  $P = 0.08$ ) (13). In our institution, surgery followed by RT was the mainstay for treating patients with OPSCC, based on clinical factors and physician discretion, including concern for the short-/long-term toxicity of RT. Recently, surgical management of OPSCC has seen increasing application with advances in minimally invasive surgery, such as robotic and transoral laser microsurgery. So, we assessed the prognosis of OPSCC managed with surgery followed by PORT stratified by p16 expression status. We confirmed that p16 (+) expression in OPSCC is an independent and favorable prognostic factor related to DFS and OS in these patients regardless of whether they received chemotherapy.

Currently, patients with HPV-positive OPSCC are treated similarly to age- and stage-matched HPV-negative counterparts although HPV testing of OPSCC is recommended for prognostic purposes. However, treatment goals and selection of therapy are debatable in these patients because HPV-positive OPSCC has a superior prognosis and a distinct patient profile, including younger age and good performance status (14). In other words, because patients with HPV-positive OPSCC are expected to live longer after treatment, avoiding late toxicity and maintaining quality of life (QOL) are particularly important. Accordingly, de-intensification of therapy may be appropriate for these HPV-positive OPSCC with good prognosis to improve associated morbidity and QOL (7,15).

Treatment strategies, including PORT and adjuvant chemotherapy, for HPV-positive OPSCC patients who have undergone surgical

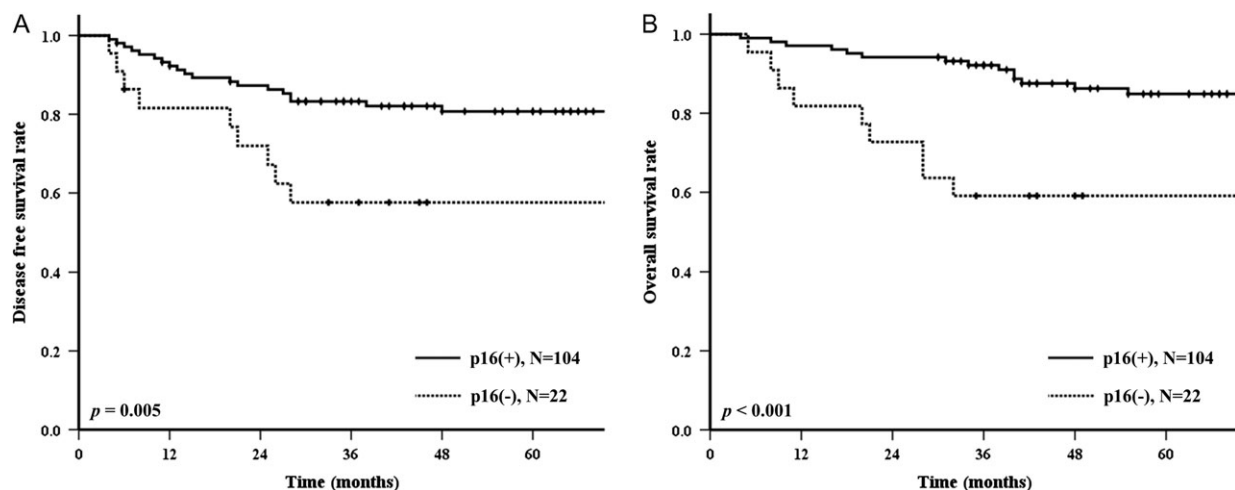**Figure 1.** Disease-free survival (DFS) (A) and overall survival (OS) (B) according to p16 expression status.



**Table 4.** Univariate and multivariate analyses of potential prognostic factors for DFS and OS

| Variable                   |                     | DFS        |       |                     |        | OS        |         |                     |        |
|----------------------------|---------------------|------------|-------|---------------------|--------|-----------|---------|---------------------|--------|
|                            |                     | UVA        |       | MVA*                |        | UVA       |         | MVA*                |        |
|                            |                     | 5-year DFS | P     | HR (95% CI)         | P      | 5-year OS | P       | HR (95% CI)         | P      |
| Age                        | <60 years           | 81.0       | 0.112 | 2.070 (0.996–4.304) | 0.051  | 82.7      | 0.209   | NI                  |        |
|                            | ≥60 years           | 70.8       |       |                     |        | 77.5      |         |                     |        |
| Sex                        | Male                | 74.1       | 0.463 | NI                  |        | 77.7      | 0.439   | NI                  |        |
|                            | Female              | 93.8       |       |                     |        | 100.0     |         |                     |        |
| Smoking                    | <10 PY <sup>a</sup> | 78.7       | 0.560 | NI                  |        | 81.2      | 0.979   | NI                  |        |
|                            | ≥10 PY              | 72.8       |       |                     |        | 78.4      |         |                     |        |
| Histologic differentiation | WD                  | 93.8       | 0.333 | NI                  |        | 93.8      | 0.509   | NI                  |        |
|                            | MD                  | 75.9       |       |                     |        | 79.3      |         |                     |        |
|                            | PD                  | 69.0       |       |                     |        | 75.4      |         |                     |        |
| p16 expression             | Negative            | 57.6       | 0.005 | Ref                 | <0.001 | 59.1      | < 0.001 | Ref                 | <0.001 |
|                            | Positive            | 80.7       |       | 0.186 (0.078–0.443) |        | 84.9      |         | 0.087 (0.033–0.229) |        |
| cT Stage                   | II–III              | 78.8       | 0.047 | NI                  |        | 81.0      | 0.465   | NI                  |        |
|                            | IV                  | 54.5       |       |                     |        | 72.7      |         |                     |        |
| cStage                     | II–III              | 87.5       | 0.361 | NI                  |        | 89.0      | 0.359   | NI                  |        |
|                            | IV                  | 72.9       |       |                     |        | 77.4      |         |                     |        |
| pT Stage                   | I–III               | 80.0       | 0.024 | Ref                 | 0.033  | 83.3      | 0.063   | Ref                 | 0.047  |
|                            | IV                  | 56.3       |       | 2.823 (1.085–7.342) |        | 62.5      |         | 2.847 (1.012–8.007) |        |
| pStage                     | I–III               | 92.4       | 0.070 | Ref                 | 0.081  | 92.8      | 0.195   | NI                  |        |
|                            | IV                  | 71.7       |       | 2.669 (0.887–8.032) |        | 76.5      |         |                     |        |
| Surgical margin            | Negative            | 82.5       | 0.161 | Ref                 | 0.091  | 87.9      | 0.053   | Ref                 | 0.043  |
|                            | Positive            | 68.1       |       | 1.955 (0.898–4.259) |        | 69.1      |         | 2.500 (1.029–6.069) |        |
| ECE                        | Absent              | 82.9       | 0.074 | NI                  |        | 84.7      | 0.140   | NI                  |        |
|                            | Present             | 66.1       |       |                     |        | 73.3      |         |                     |        |
| PNI                        | Absent              | 80.5       | 0.007 | NI                  |        | 83.0      | 0.048   | NI                  |        |
|                            | Present             | 42.9       |       |                     |        | 56.8      |         |                     |        |
| LVI                        | Absent              | 82.3       | 0.028 | Ref                 | 0.012  | 84.4      | 0.147   | NI                  |        |
|                            | Present             | 60.1       |       | 2.740 (1.252–5.998) |        | 66.9      |         |                     |        |
| Adjuvant therapy           | RT                  | 80.5       | 0.221 | NI                  |        | 81.4      | 0.852   | NI                  |        |
|                            | CRT                 | 65.4       |       |                     |        | 74.6      |         |                     |        |

DFS, disease-free survival; OS, overall survival; UVA, univariate analysis; MVA, multivariate analysis; HR, hazard ratio; CI, confidence interval; NI, not included; Ref, reference.

<sup>a</sup>Calculation includes patients had smoking history that both non-smoker and below 10 PY.

\*Variables were entered into the multivariate Cox regression model in a stepwise method if  $P < 0.10$  and were removed at any point if  $P \geq 0.10$ .

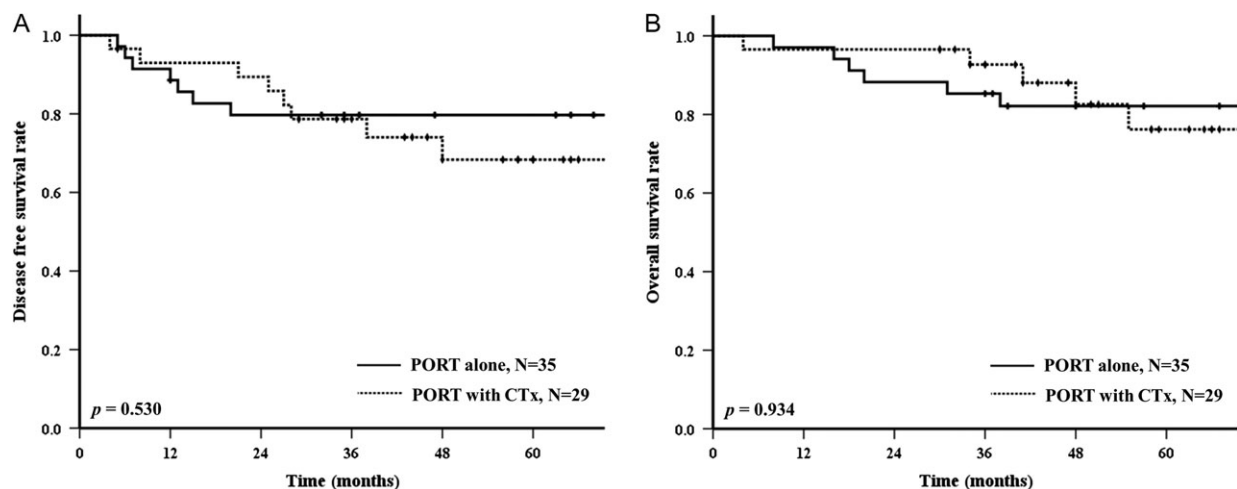

**Figure 2.** DFS (A) and OS (B) in p16 (+) oropharyngeal squamous cell carcinoma patients with high-risk factors that were treated with postoperative radiotherapy (PORT) alone versus PORT with chemotherapy (CTx).

resection have not yet emerged. Traditionally, PORT has been the standard adjuvant approach postoperatively for OPSCC patients with risk factors such as positive surgical margin, ECE, multiple

positive LN, PNI and LVI. Thereafter, two major Phase III randomized trials including RTOG 9501 (16) and European Organization for Research and Treatment of Cancer (EORTC) 22931 (17)

identified that high-risk patients with positive surgical margins and/or ECE in lymph node metastasis had benefit from the addition of cisplatin. However, these two randomized trials did not consider the significance of HPV status. Our cohort showed a 20–30% increase in the 5-year DFS and OS over those of RTOG 9501 and EORTC 22931 trials. These outcomes came from a high percentage of p16 (+) disease in this cohort. The sharp increase in the proportion of HPV-positive OPSCC occurred after the year 2000, and the percentage of carcinogenic HPV in the etiology of OPSCC has doubled over the last decade (2). The cohorts of RTOG 9501 and EORTC 22931 were treated with PORT or PORT with chemotherapy before 2000, while the cohort in this study was treated after the year 2000.

We observed that patients with p16 (+) OPSCC and high-risk factors ( $n = 63$ ) had excellent DFS and OS of 75.1% and 80.7%, respectively, although only 45% of these patients received PORT with chemotherapy. It is reasonable to propose that de-intensification adjuvant treatment may be considered in the management of select p16 (+) OPSCC with high-risk features showed favorable outcome regardless of concurrently adjuvant chemotherapy. Based on our findings, a re-evaluation of the routine application of concurrent chemotherapy during PORT for p16 (+) OPSCC with high-risk factors may be warranted. Also, in this study, it is noteworthy that LVI, which is traditionally considered a minor or moderate risk factor, was a more important risk factor for survival than ECE in p16 (+) OPSCC. Maxwell reported that ECE, a long-established major risk factor, was not significantly associated with worse DSS in p16-positive OPSCC patients (18). Ultimately, the superior prognosis associated with p16 (+) disease may indicate a need to re-examine traditional risk factors and stratification in the postoperative setting.

Despite the overall good prognosis for HPV-positive OPSCC, some aggressive subtypes have been described, characterized by distant spread (19) and advanced nodal stage (20). Likewise, some patients with HPV-positive OPSCC remain at risk of poor outcome, complicating de-intensification efforts. Therefore, we should classify risk group for studies testing de-intensification approaches. Currently, de-intensification trials are being conducted for HPV-positive OPSCC based on risk factors in the postoperative setting. The Phase III ADEPT (NCT01687413) trial (21) is investigating a treatment de-intensification strategy by comparing RT alone to CRT in HPV-positive OPSCC patients with ECE in lymph node metastasis and a negative surgical margin who also underwent surgery. Also, the Eastern Cooperative Oncology Group (ECOG) 3311 (NCT01898494) (22) is conducting a Phase II trial in which patients with resectable p16 (+) OPSCC are stratified into four-arm treatments according to their surgical pathology after transoral surgery. In that study, patients are randomized into either low-dose or standard-dose PORT, with or without chemotherapy.

Our study has some limitations. Owing to data with retrospective in nature, we could not assess functional outcomes of swallowing, salivation, speech and diet. In addition, it comprised relatively small patient cohorts. Next, the use of p16 immunohistochemistry as a sole marker for HPV positivity is unsatisfactory. Although p16 overexpression is a sensitive technique to detect the presence of HPV in OPSCC, polymerase chain reaction testing and *in situ* hybridization would further improve the validation (23,24). Finally, our data did not examine an association between p16 expression and molecular biomarkers such as epidermal growth factor receptor and p53 in OPSCC, which could provide important prognostic information (25–27).

In conclusion, HPV positivity based on expression of p16 is a strong and independent prognosticator of survival in OPSCC treated with surgical resection followed by PORT. Future research will

confirm whether the traditional risk factors and risk stratification applies equally to the HPV-positive cohort. Additional studies will be able to validate optimal de-intensification approaches according to the risk group for p16 (+) OPSCC in the postoperative setting.

## Supplementary data

Supplementary data are available at <http://www.jjco.oxfordjournals.org>.

## Funding

No specific funding was received for this study.

## Conflict of interest statement

None declared.

## References

1. Chaturvedi AK, Engels EA, Anderson WF, Gillison ML. Incidence trends for human papillomavirus-related and -unrelated oral squamous cell carcinomas in the United States. *J Clin Oncol* 2008;26:612–9.
2. Mehanna H, Beech T, Nicholson T, et al. Prevalence of human papillomavirus in oropharyngeal and nonoropharyngeal head and neck cancer—systematic review and meta-analysis of trends by time and region. *Head Neck* 2013;35:747–55.
3. Dahlstrom KR, Calzada G, Hanby JD, et al. An evolution in demographics, treatment, and outcomes of oropharyngeal cancer at a major cancer center: a staging system in need of repair. *Cancer* 2013;119:81–9.
4. Kreimer AR, Clifford GM, Boyle P, Franceschi S. Human papillomavirus types in head and neck squamous cell carcinomas worldwide: a systematic review. *Cancer Epidemiol Biomarkers Prev* 2005;14:467–75.
5. D'Souza G, Kreimer AR, Viscidi R, et al. Case-control study of human papillomavirus and oropharyngeal cancer. *N Engl J Med* 2007;356:1944–56.
6. Ang KK, Harris J, Wheeler R, et al. Human papillomavirus and survival of patients with oropharyngeal cancer. *N Engl J Med* 2010;363:24–35.
7. O'Sullivan B, Huang SH, Siu LL, et al. Deintensification candidate subgroups in human papillomavirus-related oropharyngeal cancer according to minimal risk of distant metastasis. *J Clin Oncol* 2013;31:543–50.
8. Begum S, Gillison ML, Ansari-Lari MA, Shah K, Westra WH. Detection of human papillomavirus in cervical lymph nodes: a highly effective strategy for localizing site of tumor origin. *Clin Cancer Res* 2003;9:6469–75.
9. Singhi AD, Westra WH. Comparison of human papillomavirus *in situ* hybridization and p16 immunohistochemistry in the detection of human papillomavirus-associated head and neck cancer based on a prospective clinical experience. *Cancer* 2010;116:2166–73.
10. Marur S, D'Souza G, Westra WH, Forastiere AA. HPV-associated head and neck cancer: a virus-related cancer epidemic. *Lancet Oncol* 2010;11:781–9.
11. Rischin D, Young RJ, Fisher R, et al. Prognostic significance of p16INK4A and human papillomavirus in patients with oropharyngeal cancer treated on TROG 02.02 phase III trial. *J Clin Oncol* 2010;28:4142–8.
12. Haughey BH, Sinha P. Prognostic factors and survival unique to surgically treated p16+ oropharyngeal cancer. *Laryngoscope* 2012;122:S13–33.
13. Rahmati R, Dogan S, Pyke O, et al. Squamous cell carcinoma of the tonsil managed by conventional surgery and postoperative radiation. *Head Neck* 2015;37:800–7.
14. D'Souza G, Zhang HH, D'Souza WD, Meyer RR, Gillison ML. Moderate predictive value of demographic and behavioral characteristics for a diagnosis of HPV16-positive and HPV16-negative head and neck cancer. *Oral Oncol* 2010;46:100–4.

15. Masterson L, Moualel D, Liu ZW, et al. De-escalation treatment protocols for human papillomavirus-associated oropharyngeal squamous cell carcinoma: A systematic review and meta-analysis of current clinical trials. *Eur J Cancer* 2014;50:2636–48.
16. Cooper JS, Pajak TF, Forastiere AA, et al. Postoperative concurrent radiotherapy and chemotherapy for high-risk squamous-cell carcinoma of the head and neck. *N Engl J Med* 2004;350:1937–44.
17. Bernier J, D'Amico C, Ozsahin M, et al. Postoperative irradiation with or without concomitant chemotherapy for locally advanced head and neck cancer. *N Engl J Med* 2004;350:1945–52.
18. Maxwell JH, Ferris RL, Gooding W, et al. Extracapsular spread in head and neck carcinoma: impact of site and human papillomavirus status. *Cancer* 2013;119:3302–8.
19. Huang SH, Perez-Ordóñez B, Weinreb I, et al. Natural course of distant metastases following radiotherapy or chemoradiotherapy in HPV-related oropharyngeal cancer. *Oral Oncol* 2013;49:79–85.
20. McIlwain WR, Sood AJ, Nguyen SA, Day TA. Initial symptoms in patients with HPV-positive and HPV-negative oropharyngeal cancer. *JAMA Otolaryngol Head Neck Surg* 2014;140:441–7.
21. Washington University School of Medicine. *Post operative adjuvant therapy de-intensification trial for human papillomavirus-related, p16+ oropharynx cancer (ADEPT)* (NCT01687413), <http://clinicaltrials.gov/ct2/show/NCT01687413?term=NCT01687413&rank=1>. (18 July 2016, date last accessed).
22. Eastern Cooperative Oncology Group. *Transoral surgery followed by low-dose or standard-dose radiation therapy with or without chemotherapy in treating patients with HPV positive stage III-IVA oropharyngeal cancer* (NCT01898494). <http://clinicaltrials.gov/ct2/show/NCT01898494?term=NCT01898494&rank=1>. (18 July 2016, date last accessed).
23. Ukpo OC, Flanagan JJ, Ma XJ, Luo Y, Thorstad WL, Lewis JS Jr. High-risk human papillomavirus E6/E7 mRNA detection by a novel in situ hybridization assay strongly correlates with p16 expression and patient outcomes in oropharyngeal squamous cell carcinoma. *Am J Surg Pathol* 2011;35:1343–50.
24. Lewis JS Jr. p16 Immunohistochemistry as a standalone test for risk stratification in oropharyngeal squamous cell carcinoma. *Head Neck Pathol* 2012;6:S75–82.
25. Kozomara R, Jovic N, Magic Z, Brankovic-Magic M, Minic V. p53 mutations and human papillomavirus infection in oral squamous cell carcinomas: correlation with overall survival. *J Craniomaxillofac Surg* 2005;33:342–8.
26. Fallai C, Perrone F, Licitra L, et al. Oropharyngeal squamous cell carcinoma treated with radiotherapy or radiochemotherapy: prognostic role of TP53 and HPV status. *Int J Radiat Oncol Biol Phys* 2009;75:1053–9.
27. Reimers N, Kasper HU, Weissenborn SJ, et al. Combined analysis of HPV-DNA, p16 and EGFR expression to predict prognosis in oropharyngeal cancer. *Int J Cancer* 2007;120:1731–8.
